1 **Molecular convergence and positive selection associated with the evolution of symbiont**  
2 **transmission mode in stony corals**

3

4 Groves B. Dixon<sup>a,1</sup> and Carly D. Kenkel<sup>b,2</sup>

5 <sup>a</sup>Department of Integrative Biology, The University of Texas at Austin, 1 University Station  
6 C0990, Austin, TX 78712, USA

7 <sup>b</sup>Department of Biological Sciences, University of Southern California, 3616 Trousdale  
8 Parkway, Los Angeles, CA 90089, USA

9

10 <sup>1</sup>Email: [grovesdixon@gmail.com](mailto:grovesdixon@gmail.com)

11 <sup>2</sup>Corresponding author, email: [ckenkel@usc.edu](mailto:ckenkel@usc.edu); phone: 213-821-1705; fax: 213-740-8123

12

13 KEYWORDS: intracellular symbiosis, *Scleractinia*, transcriptomes, molecular evolution, dN/dS

14

15 DATA ARCHIVAL LOCATION: Raw sequencing data generated for this study have been  
16 uploaded to NCBI's SRA: PRJNA395352. All bioinformatic scripts and input files can be found  
17 at [https://github.com/grovesdixon/convergent\\_evo\\_coral](https://github.com/grovesdixon/convergent_evo_coral).

18

19

20

21

22

23

24 **Abstract**

25           Heritable symbioses are thought to be important for the maintenance of mutually  
26 beneficial relationships (1), and for facilitating major transitions in individuality, such as the  
27 evolution of the eukaryotic cell (2, 3). In stony corals, vertical transmission has evolved  
28 repeatedly (4), providing a unique opportunity to investigate the genomic basis of this complex  
29 trait. We conducted a comparative analysis of 25 coral transcriptomes to identify orthologous  
30 genes exhibiting both signatures of positive selection and convergent amino acid substitutions in  
31 vertically transmitting lineages. The frequency of convergence events tends to be higher among  
32 vertically transmitting lineages, consistent with the proposed role of natural selection in driving  
33 the evolution of convergent transmission mode phenotypes (5). Of the 10,774 total orthologous  
34 genes identified, 403 exhibited at least one molecular convergence event and evidence of  
35 positive selection in at least one vertically transmitting lineage. Functional enrichments among  
36 these top candidate genes include processes previously implicated in mediating the coral-  
37 *Symbiodiniaceae* symbiosis including endocytosis, immune response, cytoskeletal protein  
38 binding and cytoplasmic membrane-bounded vesicles (6). We also identified 100 genes showing  
39 evidence of positive selection at the particular convergence event. Among these, we identified  
40 several novel candidate genes, highlighting the value of our approach for generating new insight  
41 into the mechanistic basis of the coral symbiosis, in addition to uncovering host mechanisms  
42 associated with the evolution of heritable symbioses.

43

44

45

46

## 47 **Introduction**

48           For organisms that engage in symbiosis, the mode in which symbionts are transmitted to  
49 the next host generation is a major factor governing the ecological and evolutionary dynamics of  
50 the relationship across multiple scales of biological organization. For example, transmission  
51 mode is known to influence genome size and content, cooperative interactions between partners,  
52 holobiont ecology, and the speciation rates of both partners (7–11). Two transmission modes  
53 predominate in nature: offspring can either directly inherit symbionts, typically through the  
54 maternal line in the process of vertical transmission, or they can horizontally acquire symbionts  
55 from the environment, usually early in their development (reviewed in (12)); although it is  
56 important to note that the mode of transmission can change over evolutionary time (13) and  
57 mixed-mode transmission is also possible (12). In microbial symbioses, horizontal transmission  
58 is the basal state and repeated transitions to vertical transmission may have arisen as a means to  
59 further promote host-symbiont cooperation (13–15). Vertical transmission has been hypothesized  
60 to play an important role in the maintenance of mutually beneficial symbioses (1), and likely  
61 facilitated major evolutionary transitions in individuality, such as the evolution of the eukaryotic  
62 cell (2, 3). From the perspective of the symbiont, the genomic consequences of evolving a  
63 heritable symbiosis include a reduction in genome size and increased dependence on their hosts  
64 due to the loss of functionally redundant genes (3, 10). However, the underlying genetic  
65 architecture facilitating evolution of a heritable symbiosis from the perspective of the host  
66 remains unresolved.

67           The evolution of vertical transmission is predicted to be correlated with the evolution of  
68 host control mechanisms (16) and theory predicts a high rate of mutation in genes responsible for  
69 the host-symbiont fitness interaction (17). Selection on mechanisms critical for the establishment

70 and maintenance of a horizontally transmitted symbiosis, such as cell surface molecules  
71 mediating inter-partner recognition, is likely also relaxed (12). Among metazoan hosts, diverse  
72 behavioral, developmental and physiological mechanisms are known to facilitate the vertical  
73 transmission of microbial endosymbionts (13, 16), yet there is also some evidence for phenotypic  
74 convergence. For example, plant-sucking stinkbugs and lice require microbial gut symbionts to  
75 facilitate digestion of sap and blood, respectively, but both have evolved additional specialized  
76 organs for housing bacteria along the female reproductive tract for the transmission of symbionts  
77 to eggs (16, 18). Convergent evolution at the phenotypic level is often the result of similar  
78 changes at the genomic level (19, 20) and comparative analyses have facilitated understanding of  
79 the genetic basis of convergently evolved phenotypes in diverse taxa (19, 21, 22). Therefore, by  
80 comparing vertically transmitting lineages with their closest horizontally transmitting relatives it  
81 may be possible to identify candidate genes involved in the evolution of convergent transmission  
82 mode phenotypes.

83 Reef-building corals exhibit both horizontal and vertical transmission of their obligate  
84 intracellular *Symbiodiniaceae* symbionts, offering an ideal opportunity to utilize such a  
85 comparative approach to identify candidate genes involved the evolution of symbiont  
86 transmission mode. The majority of coral species acquire their symbionts from the environment  
87 early in their development, but vertical transmission is exhibited by species in multiple different  
88 lineages, indicating that transmission mode has evolved independently at least four times (4, 23).  
89 Yet there is also significant morphological, physiological and ecological trait variation across the  
90 coral phylogeny (24), which can confound a comparative approach. In corals, transmission mode  
91 is often correlated with reproductive mode as coral species which broadcast spawn gametes tend  
92 to exhibit horizontal transmission, while species that internally brood larvae largely transmit

93 symbionts vertically (4). However, the association is not perfect; some *Porites* spp. and all  
94 known *Montipora* spp. have convergently evolved to broadcast spawn eggs which contain  
95 *Symbiodiniaceae* (25, 26). We therefore sequenced the transcriptome of the vertically  
96 transmitting broadcast spawner, *Montipora aequituberculata*, in addition to mining other  
97 publicly available coral sequence resources (Table S1), to compile a set of transcriptomic  
98 references in which vertical transmitters could be compared with their closest horizontally  
99 transmitting relatives, while also accounting for variation in other life-history traits (Fig. 1).  
100 From this dataset, we inferred orthologous groups and identified genes showing both signatures  
101 of positive selection and convergent amino acid substitutions (overlapping amino acid changes  
102 resulting from independent amino acid substitutions at the same position in two or more  
103 lineages). We found that the frequency of molecular convergence tended to be higher among  
104 vertically transmitting lineages and although top genes are enriched for biological processes  
105 previously implicated in the coral-algal symbiosis, we also identify several novel candidates,  
106 generating new insight into the mechanistic basis of this relationship.

107

## 108 **Results & Discussion**

### 109 *Ortholog identification*

110 To examine molecular convergence and positive selection, we compared homologous  
111 coding sequences from transcriptomic data of 25 coral species. First, protein coding sequences  
112 were predicted from the transcriptomic data based on open reading frames and sequence  
113 homology to known proteins (27) and protein domains (28), and *FastOrtho* (29) was used to  
114 assign sequences to preliminary orthologous groups (N = 106,300 groups). A subset of 1,196  
115 single-copy orthologous groups with at least 20 of the 28 taxa represented was used to construct

116 a species tree (Fig. 1), which recapitulates known relationships reported in earlier studies using  
117 single-gene (23, 30) and multi-gene phylogenies (31). We then identified putative single-copy  
118 orthologs (groups with only a single representative sequence from each species) from the initial  
119 set of 20,563 orthologous groups for which at least 7 (25%) of the species were represented. Of  
120 these, 9,794 were truly single copy, whereas 10,769 had multiple sequences for one or more  
121 species. Two biological explanations for this observation are gene duplication events subsequent  
122 to the relevant speciation event, or transcript isoforms of the same gene (32). Transcript isoforms  
123 are more likely given the nature of the dataset, but in either case, any sequence from these  
124 monophyletic groupings can be appropriately compared to those from other species. Therefore,  
125 rather than eliminate all orthologous groups with multiple sequences, we applied a filtering  
126 approach similar to that described by (32) to retain an additional 3,298 of the 10,769 multiple  
127 sequence orthologs. Specifically, we constructed gene trees from the protein alignments and  
128 pruned away all but the longest of multiple sequences from single species that formed  
129 monophyletic clades (Fig. S1; see Methods). In this way, we identified a total of 13,092 total  
130 single copy orthologs. Orthologs were then aligned using MAFFT (33) and reverse translated  
131 into codon sequences using Pal2Nal (34).

132         Orthologs were further quality filtered based on monophyly of known clades. Individual  
133 gene trees were constructed from nucleotide alignments of each single-copy ortholog and  
134 checked for monophyly of known clades (Fig. 1, 1-8 and Robusta/Complexa). All species fell  
135 within their expected clades in 58% of the gene trees. If a single sequence fell outside of its  
136 expected clade or clades, that sequence was removed and the ortholog was retained (27% of  
137 orthologous groups). If more than one sequence fell outside its expected clade the ortholog was  
138 removed (15% of orthologous groups). In total, this left 119,049 sequences (mean species per

139 orthologous group = 10.7) comprising 11,130 orthologous groups, hereafter referred to as genes,  
140 which were used for the ancestral reconstruction and branch-site tests. Genes with fewer than 5  
141 representative sequences were also removed, resulting in a final total of 10,774 genes.

#### 142 *Evidence of positive selection and molecular convergence*

143 For each orthologous nucleotide alignment, PAML (35) was used to reconstruct the  
144 ancestral amino acid at each node in the species tree and identify the amino acid changes that  
145 occurred along the branches of the tree. We focused our analysis on eight clades (four with  
146 vertical transmission and four with horizontal transmission), and identified all overlapping  
147 substitutions, or independent substitutions occurring at the same position between the branches  
148 leading directly to these clades' most recent common ancestors (Fig. 1). We classified  
149 substitutions according to the type of change observed: parallel substitutions refer to the same  
150 derived amino acid evolving from the same ancestral amino acid, convergent substitutions refer  
151 to same derived amino acid evolving from different ancestral amino acids, divergent  
152 substitutions refer to different derived amino acids evolving from the same ancestral amino acid  
153 and 'all different' refer to different derived amino acids evolving from different ancestral amino  
154 acids. Following (36), we consider both parallel and convergent substitutions to be indicative of  
155 molecular convergence.

156 Among the vertical transmitters, we identified 8,952 amino acid positions exhibiting  
157 either parallel (n=8,877) or convergent (n=75) substitutions in at least two lineages (ancestral  
158 reconstruction posterior estimate > 0.8, Fig. 2A, Fig. S2). The convergence events occurred in  
159 4,117 out of 10,774 total genes in the dataset, with an average of 0.71 convergent sites identified  
160 per gene (median = 0; Fig. 2B). Of the four possible types of overlapping substitutions,  
161 convergent substitutions were by far the least frequent (Fig. 2A; Fig. S2). The most common

162 type was divergent substitutions. The two remaining types, parallel and ‘all different’ occurred  
163 with roughly similar frequency (Fig. 2A). Across the entire dataset, 11% of overlapping  
164 substitutions were classified as molecular convergence (convergent or parallel).

165 In addition to quantifying molecular convergence, we also tested for evidence of positive  
166 selection in each vertically transmitting lineage and for all vertically transmitting lineages at  
167 once using the branch-site models in PAML (35). We found evidence of positive selection in  
168 954 genes (LRT test FDR<0.1 in at least one branch-site test, Table S2) and many instances in  
169 which molecular convergence and positive selection were detected in the same gene (Fig. 3A;  
170 Fig. S3). In total, 403 genes showed at least one molecular convergence event between vertically  
171 transmitting lineages as well as positive selection in at least one of the lineages (Table S3).

172 Finally, we took advantage of the fact that the branch site test identifies individual amino  
173 acid positions that show evidence of positive selection (37), and identified a list of 100 genes for  
174 which the particular convergence event also showed evidence of positive selection in one or both  
175 lineages (branch site LRT p-value < 0.05 and BEB > 0.8; Table S4). No ontology enrichments  
176 were detected for this reduced group, but annotations were recovered for 66 of the 100 genes.

### 177 *The frequency of molecular convergence*

178 The probability of parallel molecular evolution in response to selection is predicted to be  
179 twice as high as that under neutrality (38). Enforcement of vertical transmission in a laboratory  
180 manipulation of an anemone-*Symbiodiniaceae* symbiosis resulted in a host growth advantage,  
181 suggesting that the evolution of vertical transmission in Cnidarian symbioses may be favored by  
182 selection (39). However, an earlier analysis of genomic convergence among phenotypically  
183 convergent marine mammal lineages revealed that convergence was actually highest in terrestrial  
184 sister taxa in which no phenotypic convergence was evident, suggesting that the options for



185 adaptive evolution may be limited by pleiotropic constraints (22). To assess the relative  
186 frequency of molecular convergence in our dataset we compared the proportion of molecular  
187 convergence in overlapping substitutions among three sets of phenotype pairs (vertical  
188 transmitters with other vertical transmitters, verticals with horizontals, and horizontals with other  
189 horizontals). This helped to control for possible confounding factors such as differences in  
190 mutation rate, and varying representation for each species based on data quality that may  
191 influence the absolute levels of molecular convergence detected (40).

192 We found no significant differences among phenotypic pairings in the mean proportion of  
193 molecular convergence (Fig. S4), molecular convergence and positive selection (Fig. S3), or  
194 specific convergence events in which the sites were also identified as being positively selected  
195 (Fig. S5). However, the proportion of convergence events is qualitatively different, and for each  
196 of these three data subsets, is higher among vertically transmitting pairs (Figure S3-S5).  
197 Although this pattern is tenuous, likely attributable to the small number of possible vertical-  
198 vertical comparisons, it is consistent with a proposed role of natural selection in driving the  
199 evolution of these convergent transmission mode phenotypes (5).

#### 200 *Functional enrichments among top candidate genes*

201 Coral symbionts reside within host gastrodermal cells, surrounded by a host-derived  
202 membrane known as the symbiosome (41). Although the specific genes mediating the  
203 establishment and long-term maintenance of this relationship remain unresolved, a number of  
204 biological processes are thought to be involved including host-microbe signaling, regulation of  
205 the host innate immune response and cell cycle, phagocytosis, and cytoskeletal rearrangement  
206 (6). To evaluate whether any of these previously highlighted processes were enriched among the  
207 403 genes exhibiting both signatures of selection and convergent evolution, gene annotations

208 were obtained from comparisons against the UniProt Swiss-Prot database (27) and a categorical  
209 functional enrichment analysis (FDR<0.1) was performed. Top functional enrichments  
210 (FDR<0.01) among biological processes (BP) terms included regulation of developmental  
211 growth and cell morphogenesis, and biological adhesion (GO:0048638; GO:0010769;  
212 GO007155; GO0022610). Endocytosis (GO:0006897) and immune response (GO:0006955)  
213 were also significant (FDR<0.1). Among molecular functions (MF), cytoskeletal protein binding  
214 (GO:0008092) was the most significant enrichment (FDR=0.016, Fig. 3B). Extracellular region  
215 (GO:0005576) was the most significantly enriched term among cellular components (CC),  
216 however, this term was also highlighted in a comparison of horizontally transmitting sister clades  
217 (Fig. S6), suggesting that it may be under selection in all corals and not necessarily specific to  
218 the evolution of vertical transmission. Additional top CC enrichments (FDR<0.1) specific to  
219 vertically transmitting lineages include cell junctions (GO:0030054) and cytoplasmic membrane-  
220 bounded vesicles (GO:0016023).

221 Three individual genes, ABL proto-oncogene 1 (ABL 1, ORTHOMCL8234), filamin C  
222 (ORTHOMCL8658), and poly(rC) binding protein 2 (ORTHOMCL8545), warrant additional  
223 discussion as they are classified among significantly enriched GO terms in all three ontology  
224 categories (BP, CC and MF) and were also among the less than 1% of genes in which the  
225 particular convergence event also showed evidence of positive selection (Fig. 4; Table S4).  
226 Importantly, none of these candidates have been previously implicated in the host-symbiont  
227 relationship in earlier analyses focusing on either coral bleaching, the breakdown of the  
228 symbiosis (42–46), or on the establishment of symbiosis in horizontally-transmitting corals (47–  
229 49), highlighting the value of the present approach for identifying novel candidate genes  
230 potentially underpinning the coral symbiosis.

231 ABL 1 is a ubiquitously expressed nonreceptor tyrosine kinase known to be involved in  
232 organismal responses to a multitude of signals, including cell adhesion, DNA damage, oxidative  
233 stress and cytokines (50). This gene that has likely evolved to serve a variety of context-  
234 dependent biological functions, but is known to regulate several immune response phenotypes in  
235 mammals including antigen receptor signaling in lymphocytes, and bacterial adhesion to host  
236 cells (51–53). Through its role in regulating actin polymerization, ABL 1 is also involved in  
237 endocytosis (54), supporting the hypothesis that it may play a key role in mediating the heritable  
238 transmission of symbionts. Filamins are another family of actin-binding proteins which also  
239 exhibit great functional diversity in their interactions (55). While Filamin C was not identified in  
240 earlier functional genomic studies, expression of Filamin A was recently reported to be modified  
241 by temperature over the course of a monthly reproductive cycle in *Pocillopora damicornis*, a  
242 vertically-transmitting brooding coral (56). Similarly, Filamin B was found to be differentially  
243 expressed between symbiotic and aposymbiotic *Aiptasia* anemones (57). Combined, these results  
244 suggest an important role for this gene family in the maintenance and transmission of symbionts.  
245 Poly(C)-binding proteins also exhibit substantial functional diversity, but they are involved in  
246 transcriptional and translational regulation in addition to acting as structural components in  
247 DNA-protein complexes (58). Interestingly, poly(rC) binding protein 2 is a negative regulator of  
248 mitochondrial antiviral signaling protein (MAVS), a critical component of innate antiviral  
249 immunity, where overexpression has been shown to reduce, and knockdown to increase, cellular  
250 responses to viral infection (59). MAVS interacts with RIG-I-like (RLR) pattern recognition  
251 receptors, which are located in the cytoplasm, to identify foreign RNA (60). However, they have  
252 also been shown to function in defense against some bacterial pathogens (60, 61), suggesting that

253 regulation of poly(rC) binding protein 2 could be involved in suppressing host innate immune  
254 responses against intracellular symbionts.

255  
256 *Conclusions*

257         Climate change and other anthropogenic processes threaten corals because of the  
258 sensitivity of the coral-dinoflagellate symbiosis to environmental stress (62, 63). Significant  
259 work has gone into investigating the breakdown of this relationship in the process known as  
260 ‘coral bleaching’ over the past three decades, yet fundamental questions remain unresolved,  
261 including a complete understanding of the genomic architecture underpinning the host-symbiont  
262 relationship (6, 64). Here, rather than asking about molecular mechanisms correlated with the  
263 breakdown of the coral symbiosis, we investigated a factor predicted to reinforce it: the evolution  
264 of vertical symbiont transmission. While the genes identified here represent promising  
265 candidates for further study, it is important to note that they likely represent only a fraction of the  
266 molecular changes involved in the evolution of symbiont transmission mode as there are  
267 alternate pathways to achieve the same phenotypic outcome that do not require changes at the  
268 level of the coding sequence (65). Increasing genomic resources will facilitate a deeper  
269 understanding of such alternative mechanisms, and the concurrent development of more  
270 advanced genetic tools for manipulating the coral (66) and other Cnidarian model symbioses (67,  
271 68) will facilitate quantification of the precise phenotypic effects of these novel genes, as well as  
272 of changes in their sequence, contributing to a greater understanding of the cellular and  
273 molecular mechanisms underpinning this specific relationship, and necessary for the evolution of  
274 a heritable symbiosis.

275  
276

## 277 **Methods**

### 278 *Sample preparation and sequencing for Montipora aequituberculata reference transcriptome*

279 Samples of *Montipora aequituberculata* were collected under the Great Barrier Reef  
280 Marine Park Authority permit G12/35236.1 and G14/37318.1. To generate a *M.*  
281 *aequituberculata* reference transcriptome, five replicate fragments of a single coral colony were  
282 subject to a two-week temperature stress experiment as described in (5) and snap frozen samples  
283 from control (27°C, days 4 and 17) and heat (31°C, days 2, 4 and 17) treatments were crushed in  
284 liquid nitrogen and total RNA was extracted using an Aurum Total RNA mini kit (Bio-Rad, CA).  
285 RNA quality and quantity were assessed using the NanoDrop ND-200 UV-Vis  
286 Spectrophotometer (Thermo Scientific, MA) and gel electrophoresis. RNA samples from  
287 replicate fragments were pooled in equal proportions and 1.8 µg was shipped on dry ice to the  
288 Genome Sequencing and Analysis Facility (GSAF) at the University of Texas at Austin where  
289 Illumina TruSeq Stranded libraries were prepared and sequenced on one lane of the Illumina  
290 HiSeq 4000 to generate 2 x 150 PE reads.

### 291 *Transcriptome assembly and annotation*

292 Sequencing yielded 98 million raw PE reads. The *fastx\_toolkit*  
293 ([http://hannonlab.cshl.edu/fastx\\_toolkit](http://hannonlab.cshl.edu/fastx_toolkit)) was used to discard reads < 50 bp or having a  
294 homopolymer run of 'A'  $\geq 9$  bases, retain reads with a PHRED quality of at least 20 over 80% of  
295 the read and to trim TruSeq sequencing adaptors. PCR duplicates were then removed using a  
296 custom perl script (<https://github.com/z0on/annotatingTranscriptomes>). Remaining high quality  
297 filtered reads (37.7 million paired reads; 6.7 million unpaired reads) were assembled using  
298 Trinity v 2.0.6 (69) using the default parameters and an *in silico* read normalization step at the  
299 Texas Advanced Computing Center (TACC) at the University of Texas at Austin. Since corals

300 are ‘holobionts’ comprised of host, *Symbiodiniaceae* and other microbial components, resulting  
301 assemblies were filtered to identify the host component following the protocol described in (70).

### 302 *Additional transcriptomic resources*

303 Transcriptomic data from 25 species of Scleractinia (stony corals) and 3 species of  
304 Actiniaria (anemones) were downloaded from the web (Table S1; (71); (72); (73); (74); (75);  
305 (42); (76); (77); (78); (79); (80); (81); (82); (83); (84); (70)).

### 306 *Protein sequence prediction*

307 To prepare sequences for protein sequence prediction, we first modified sequence  
308 definition lines for each transcriptome to include the species name and an arbitrary sequence  
309 number. To remove highly similar isoforms, we used cd-hit (85) to cluster sequences with a  
310 sequence identity threshold of 0.98, alignment coverage for the longer sequence at least 0.3 and  
311 alignment coverage of the shorter sequence at least 0.3. For each resulting cluster, we retained  
312 only the longest sequence.

313 Protein coding sequences were predicted from the transcriptomic data based on open  
314 reading frames and sequence homology to known proteins and protein domains. Protein  
315 prediction steps were implemented with Transdecoder (86). First, the longest open reading  
316 frames (ORFs) were identified using a minimum amino acid length of 100. Then protein  
317 sequences were predicted from the longest ORFs based on blastp alignments against the  
318 Swissprot database (27) and protein domains identified with scanHmm in HMMER version  
319 3.1b2 (28). The resulting coding sequence predictions were used for all downstream analyses.

320 The predicted protein and coding sequences are available on github:

321 [https://github.com/grovesdixon/transcriptomes\\_convergent\\_evo\\_coral.git](https://github.com/grovesdixon/transcriptomes_convergent_evo_coral.git).

### 322 *Ortholog assignment*

323 Predicted coding sequences were assigned to orthologous groups using FastOrtho, an  
324 implementation of OrthoMCL (29) available through Pathosystems Resource Integration Center  
325 (PATRIC) web resources (87)(<http://enews.patricbrc.org/fastortho/>). We ran FastOrtho using  
326 reciprocal blastp results with an e-value cutoff of 1e-10, excluding hits with alignment lengths  
327 less than 75% of subject sequences.

### 328 *Construction of species tree*

329 To construct a species tree, we used a subset of 1,196 single-copy orthologous groups  
330 with at least 20 of the 28 taxa represented. The codon sequence alignments were concatenated in  
331 phylip format for input into RAxML (88). The species tree was generated with the rapid  
332 bootstrapping algorithm (100 iterations) using the GTRGAMMA model and three anemone  
333 species were used as an outgroup. Trees were visualized using Dendroscope (89) and Figtree  
334 <http://tree.bio.ed.ac.uk/software/figtree/>.

### 335 *Paralog pruning*

336 When putative paralogs from the same taxon were monophyletic, all but the longest  
337 sequences were removed. This was done for an initial set of 20,563 orthologous groups for  
338 which at least 7 (25%) of the species were represented. Protein sequences for these orthologs  
339 were aligned with MAFFT using localpair (33) and gene trees were constructed using FastTree  
340 (90). At this point, sequences from the three anemone species were removed, and were not used  
341 for any further analyses. We used the biopython module Phylo (91) to identify gene trees for  
342 which multiple sequences from single species formed monophyletic groups. Removal of these  
343 sequences allowed us to include many more orthologous groups as single-copy orthologs (9,794  
344 single copy orthologs prior to pruning, 13,092 after pruning). After pruning, putative single-copy  
345 orthologs were reverse translated into codon sequences using Pal2Nal (34).

346 *Phylogenetic ortholog filtering*

347           Orthologous groups were further quality filtered based on monophyly of known clades.  
348 Here we constructed gene trees from nucleotide alignments of each single-copy ortholog. We  
349 checked these trees for monophyly of known clades (Genus *Acropora*, Genus *Montipora*, Genus  
350 *Galaxia*, Genus *Porites*, favid clade with *F. scutaria* as outgroup, pocilloporid clade with *M.*  
351 *auretenra* as outgroup, complex corals, robust corals), which were corroborated in our species  
352 tree (Fig. 1). For 58% of gene trees, all species fell within their expected clades. If a single  
353 sequence fell outside of its expected clade or clades, that sequence was removed and the ortholog  
354 was retained (27% of orthologous groups). If more than one sequence fell outside its expected  
355 clade, the ortholog was removed (15% of orthologous groups).

356 *Ancestral reconstruction and identification of convergent substitutions*

357           We used ancestral reconstructions to infer molecular convergence for the remaining high-  
358 quality orthologous groups. For each orthologous nucleotide alignment, the ancestral amino acid  
359 was identified at each node in the species tree, as well as the amino acid changes that occurred  
360 along the branches of the tree. This analysis was performed with PAML (35), using the species  
361 tree as a the guide. Example control files are available on the Github repository  
362 ([https://github.com/grovesdixon/convergent\\_evo\\_coral](https://github.com/grovesdixon/convergent_evo_coral)).

363           From the ancestral reconstruction results, we identified all substitutions that occurred at  
364 the same positions in two or more selected lineages (overlapping substitutions). The selected  
365 lineages included the branches leading to the common ancestor of four vertical transmitting  
366 clades, and their corresponding horizontally transmitting sister clade (eight clades total, Fig. 1).  
367 The horizontally transmitting sister clades were included to serve as negative controls, and for  
368 normalization of GO enrichment analyses (see below). In cases where a clade was represented by



369 a single species, the terminal branch was used as the lineage for that clade (e.g. the two *Galaxia*  
370 species, Fig. 1).

371         Following (36), we considered both parallel and convergent substitutions as molecular  
372 convergence. For a given amino acid position, parallel substitutions refer to independent changes  
373 to the same amino acid from the same ancestral amino acid. Convergent substitutions refer to  
374 independent changes to the same amino acid from different ancestral amino acids. We also  
375 recorded all other types of independent changes at the same site (i.e. changes to different amino  
376 acids from the same ancestral amino acid, and changes to different amino acids from different  
377 ancestral amino acids).

#### 378 *Testing for evidence of positive selection*

379         We tested for evidence of positive selection using the branch-site test in PAML (35).  
380 Branch-site tests were performed on each ortholog using codeml with NSSites set to 2 and fix  
381 omega set to 1 for the null model, and set to 0 for the alternative model. Example command files  
382 and tree files are available on Github ([https://github.com/grovesdixon/convergent\\_evo\\_coral](https://github.com/grovesdixon/convergent_evo_coral)).  
383 When labeling branches tested for evidence of positive selection for a given clade, only the  
384 branch leading to the most recent common ancestor of the clade was labeled (Fig. S7). In other  
385 words, whenever a vertically transmitting clade had more than one species, we tested for  
386 evidence of positive selection in the lineage leading to the common ancestor of the clade, rather  
387 than the terminal branches leading to each individual species. We made this choice because it  
388 seems likely that mutations enabling a vertical transmission phenotype occurred in the lineage  
389 leading to the common ancestor of the clade, in which vertical transmission was presumed to  
390 have already evolved. As with the convergence analysis, in cases where a clade was represented  
391 by a single species, the terminal branch for that species was labeled as foreground. Branch-site

392 tests were performed for each individual clade, and for all vertically transmitting clades at once.  
393 Significance was tested using likelihood ratio tests, and p-values were adjusted to control for  
394 false discovery rate using the Benjamini-Hochberg procedure (92). As with our analysis of  
395 molecular convergence, we repeated the tests for the horizontally transmitting sister clades to  
396 serve as a negative controls and normalization of GO enrichment. It should be noted that a  
397 significant result for the branch-site test does not prove that positive selection occurred, it merely  
398 provides evidence that it may have occurred. For simplicity, we refer to genes significant for  
399 these tests as “positively selected” as in (22).

#### 400 *Annotation of genes of interest*

401 Genes of interest were selected based on an overlap in both evidence of positive selection  
402 and convergent substitutions. Genes were annotated based on the SwissProt database and Pfam  
403 hits used for protein prediction (e-value < 1e-5, and default parameters for hmmscan). Gene  
404 Ontology (GO) associations were applied to each orthologous group based on all SwissProt  
405 genes used for prediction of any of its constituent sequences. The GO annotations for these genes  
406 were gathered from the Gene Ontology Annotation (GOA) Database (93)  
407 <ftp://ftp.ebi.ac.uk/pub/databases/GO/goa/UNIPROT/>). For cases when sequences in an  
408 orthologous group were predicted with multiple different SwissProt hits, the orthologous group  
409 was annotated with GO associations from all included SwissProt genes. Some orthologous  
410 groups had only Pfam hits. These did not receive GO annotations.

#### 411 *GO enrichment*

412 GO enrichment was performed using Fisher’s exact tests on the final set of genes  
413 exhibiting overlap in evidence of positive selection in at least one of the branch site tests and had  
414 at least one molecular convergence event among the vertically transmitting lineages. A paired

415 control analysis was performed for genes with the same signatures among the horizontally  
416 transmitting lineages (Fig. S6). To perform fewer total tests, and reduce the effect of false  
417 discovery correction, only large GO terms, associated with at least 200 orthologs in our dataset,  
418 were tested for enrichment.

419

420

421

## 422 ACKNOWLEDGEMENTS

423 This work was supported in part by an NSF International Postdoctoral Research Fellowship,  
424 DBI-1401165 to CDK. Bioinformatic analyses were carried out using computational resources of  
425 the Texas Advanced Computer Center (TACC).

426

427

428 STATEMENT OF AUTHORSHIP: CDK designed research and assembled new reference  
429 transcriptome; GBD analyzed convergence and selection; CDK wrote the first draft of the  
430 manuscript and both authors contributed to revisions.

431

432

433

434

435

436

437

438 REFERENCES

- 439 1. Frank SA (1996) Host-symbiont conflict over the mixing of symbiotic lineages. *Proc Biol Sci*  
440 263(1368):339–344.
- 441 2. Kiers ET, West SA (2015) Evolving new organisms via symbiosis. *Science* 348(6233):392–  
442 394.
- 443 3. Fisher RM, Henry LM, Cornwallis CK, Kiers ET, West SA (2017) The evolution of host-  
444 symbiont dependence. *Nature Communications* 8:15973.
- 445 4. Hartmann AC, Baird AH, Knowlton N, Huang D (2017) The Paradox of Environmental  
446 Symbiont Acquisition in Obligate Mutualisms. *Current Biology* 0(0).  
447 doi:10.1016/j.cub.2017.10.036.
- 448 5. Kenkel CD, Bay LK (2018) Exploring mechanisms that affect coral cooperation: symbiont  
449 transmission mode, cell density and community composition. *PeerJ*:in press.
- 450 6. Davy SK, Allemand D, Weis VM (2012) Cell Biology of Cnidarian-Dinoflagellate Symbiosis.  
451 *Microbiol Mol Biol Rev* 76(2):229–261.
- 452 7. Herre EA, Knowlton N, Mueller UG, Rehner SA (1999) The evolution of mutualisms:  
453 exploring the paths between conflict and cooperation. *Trends in Ecology & Evolution*  
454 14(2):49–53.
- 455 8. Sauer C, Stackebrandt E, Gadau J, Hölldobler B, Gross R (2000) Systematic relationships  
456 and cospeciation of bacterial endosymbionts and their carpenter ant host species:  
457 proposal of the new taxon *Candidatus Blochmannia* gen. nov. *International Journal of*  
458 *Systematic and Evolutionary Microbiology* 50(5):1877–1886.
- 459 9. Moran NA, Bennett GM (2014) The Tiniest Tiny Genomes. *Annual Review of Microbiology*  
460 68(1):195–215.
- 461 10. Bennett GM, Moran NA (2015) Heritable symbiosis: The advantages and perils of an  
462 evolutionary rabbit hole. *PNAS* 112(33):10169–10176.
- 463 11. Moran NA, McCutcheon JP, Nakabachi A (2008) Genomics and evolution of heritable  
464 bacterial symbionts. *Annu Rev Genet* 42:165–190.
- 465 12. Bright M, Bulgheresi S (2010) A complex journey: transmission of microbial symbionts.  
466 *Nature Reviews Microbiology* 8(3):218–230.
- 467 13. Sachs JL, Skophammer RG, Regus JU (2011) Evolutionary transitions in bacterial symbiosis.  
468 *PNAS* 108(Supplement 2):10800–10807.

- 469 14. Sachs JL, Mueller UG, Wilcox TP, Bull JJ (2004) The Evolution of Cooperation. *The Quarterly*  
470 *Review of Biology* 79(2):135–160.
- 471 15. West SA, Fisher RM, Gardner A, Kiers ET (2015) Major evolutionary transitions in  
472 individuality. *PNAS* 112(33):10112–10119.
- 473 16. Frank SA (1996) Host Control of Symbiont Transmission: The Separation of Symbionts Into  
474 Germ and Soma. *The American Naturalist* 148(6):1113–1124.
- 475 17. Drown DM, Zee PC, Brandvain Y, Wade MJ (2013) Evolution of transmission mode in  
476 obligate symbionts. *Evol Ecol Res* 15(1):43–59.
- 477 18. Kikuchi Y, et al. (2009) Host-symbiont co-speciation and reductive genome evolution in gut  
478 symbiotic bacteria of acanthosomatid stinkbugs. *BMC Biology* 7:2.
- 479 19. Stern DL (2013) The genetic causes of convergent evolution. *Nature Reviews Genetics*  
480 14(11):751.
- 481 20. Conte GL, Arnegard ME, Peichel CL, Schluter D (2012) The probability of genetic parallelism  
482 and convergence in natural populations. *Proc R Soc B* 279(1749):5039–5047.
- 483 21. Jones FC, et al. (2012) The genomic basis of adaptive evolution in threespine sticklebacks.  
484 *Nature* 484(7392):55.
- 485 22. Foote AD, et al. (2015) Convergent evolution of the genomes of marine mammals. *Nature*  
486 *Genetics* 47(3):272–275.
- 487 23. Kerr AM (2005) Molecular and morphological supertree of stony corals (Anthozoa:  
488 Scleractinia) using matrix representation parsimony. *Biological reviews of the Cambridge*  
489 *Philosophical Society* 80(4):543–558.
- 490 24. Madin JS, et al. (2016) The Coral Trait Database, a curated database of trait information for  
491 coral species from the global oceans. *Scientific Data* 3:160017.
- 492 25. Fadlallah YH (1983) Sexual reproduction, development and larval biology in scleractinian  
493 corals. *Coral Reefs* 2(3):129–150.
- 494 26. Richmond RH, Hunter CL (1990) Reproduction and recruitment of corals: comparisons  
495 among the Caribbean, the Tropical Pacific, and the Red Sea. *Marine Ecology Progress*  
496 *Series* 60(1/2):185–203.
- 497 27. Uniprot CT (2016) UniProt: the universal protein knowledgebase. *Nucleic Acids Research*  
498 45(Database issue). doi:10.1093/nar/gkw1152.
- 499 28. Eddy SR (2011) Accelerated profile HMM searches. *PLoS Computational Biology* 7(10).  
500 doi:10.1371/journal.pcbi.1002195.

- 501 29. Li L, Stoeckert CJJ, Roos DS (2003) OrthoMCL: Identification of Ortholog Groups for  
502 Eukaryotic Genomes. *Genome Research* 13(9):2178–2189.
- 503 30. Kitahara M V, Cairns SD, Stolarski J, Blair D, Miller DJ (2010) A comprehensive phylogenetic  
504 analysis of the Scleractinia (Cnidaria, Anthozoa) based on mitochondrial CO1 sequence  
505 data. *PLoS one* 5(7):e11490.
- 506 31. Bhattacharya D, et al. (2016) Comparative genomics explains the evolutionary success of  
507 reef-forming corals. *eLife Sciences* 5:e13288.
- 508 32. Kocot KM, Citarella MR, Moroz LL, Halanych KM (2013) PhyloTreePruner: A phylogenetic  
509 tree-based approach for selection of orthologous sequences for phylogenomics.  
510 *Evolutionary Bioinformatics* 2013(9):429–435.
- 511 33. Katoh K, Standley DM (2013) MAFFT multiple sequence alignment software version 7:  
512 Improvements in performance and usability. *Molecular Biology and Evolution* 30(4):772–  
513 780.
- 514 34. Suyama M, Torrents D, Bork P (2006) PAL2NAL: Robust conversion of protein sequence  
515 alignments into the corresponding codon alignments. *Nucleic Acids Research* 34:609–612.
- 516 35. Yang Z (2007) PAML 4: Phylogenetic analysis by maximum likelihood. *Molecular Biology  
517 and Evolution* 24(MI):1586–1591.
- 518 36. Zou Z, Zhang J (2015) Are convergent and parallel amino acid substitutions in protein  
519 evolution more prevalent than neutral expectations? *Molecular Biology and Evolution*  
520 32(8):2085–2096.
- 521 37. Yang Z, Wong WSW, Nielsen R (2005) Bayes empirical bayes inference of amino acid sites  
522 under positive selection. *Mol Biol Evol* 22(4):1107–1118.
- 523 38. Orr HA (2005) The Probability of Parallel Evolution. *Evolution* 59(1):216–220.
- 524 39. Sachs JL, Wilcox TP (2006) A shift to parasitism in the jellyfish symbiont *Symbiodinium*  
525 *microadriaticum*. *Proceedings of the Royal Society of London B: Biological Sciences*  
526 273(1585):425–429.
- 527 40. Thomas GWC, Hahn MW (2015) Determining the Null Model for Detecting Adaptive  
528 Convergence from Genomic Data: A Case Study using Echolocating Mammals. *Mol Biol  
529 Evol* 32(5):1232–1236.
- 530 41. Wakefield T, Farmer M, Kempf S (2000) Revised description of the fine structure of in situ  
531 “zooxanthellae” genus *Symbiodinium*. *The Biological Bulletin* 199(1):76–84.
- 532 42. Barshis DJ, et al. (2013) Genomic basis for coral resilience to climate change. *Proceedings  
533 of the National Academy of Sciences of the United States of America* 110(4):1387–92.

- 534 43. Desalvo MK, et al. (2008) Differential gene expression during thermal stress and bleaching  
535 in the Caribbean coral *Montastraea faveolata*. *Molecular Ecology* 17(17):3952–3971.
- 536 44. DeSalvo MK, Sunagawa S, Voolstra CR, Medina M (2010) Transcriptomic responses to heat  
537 stress and bleaching in the elkhorn coral *Acropora palmata*. *Marine Ecology Progress  
538 Series* 402:97–113.
- 539 45. Maor-Landaw K, et al. (2014) Gene expression profiles during short-term heat stress in the  
540 red sea coral *Stylophora pistillata*. *Global Change Biology* 20(10):3026–3035.
- 541 46. Rodriguez-Lanetty M, Harii S, Hoegh-Guldberg O (2009) Early molecular responses of coral  
542 larvae to hyperthermal stress. *Molecular Ecology* 18(24):5101–5114.
- 543 47. Voolstra CR, et al. (2009) The host transcriptome remains unaltered during the  
544 establishment of coral–algal symbioses. *Molecular Ecology* 18(9):1823–1833.
- 545 48. Schnitzler CE, Weis VM (2010) Coral larvae exhibit few measurable transcriptional changes  
546 during the onset of coral-dinoflagellate endosymbiosis. *Mar Genomics* 3(2):107–116.
- 547 49. Mohamed AR, et al. (2016) The transcriptomic response of the coral *Acropora digitifera* to  
548 a competent Symbiodinium strain: the symbiosome as an arrested early phagosome. *Mol  
549 Ecol* 25(13):3127–3141.
- 550 50. Wang JYJ (2014) The Capable ABL: What Is Its Biological Function? *Molecular and Cellular  
551 Biology* 34(7):1188–1197.
- 552 51. Arce KP de, et al. (2010) Synaptic Clustering of PSD-95 Is Regulated by c-Abl through  
553 Tyrosine Phosphorylation. *J Neurosci* 30(10):3728–3738.
- 554 52. Swimm A, et al. (2004) Enteropathogenic *Escherichia coli* Use Redundant Tyrosine Kinases  
555 to Form Actin Pedestals. *MBoC* 15(8):3520–3529.
- 556 53. Huang Y, et al. (2008) The c-Abl tyrosine kinase regulates actin remodeling at the immune  
557 synapse. *Blood* 112(1):111–119.
- 558 54. Tanos B, Pendergast AM (2006) Abl Tyrosine Kinase Regulates Endocytosis of the  
559 Epidermal Growth Factor Receptor. *J Biol Chem* 281(43):32714–32723.
- 560 55. Feng Y, Walsh CA (2004) The many faces of filamin: A versatile molecular scaffold for cell  
561 motility and signalling. *Nature Cell Biology* 6(11):1034–1038.
- 562 56. Crowder CM, Meyer E, Fan T-Y, Weis VM (2017) Impacts of temperature and lunar day on  
563 gene expression profiles during a monthly reproductive cycle in the brooding coral  
564 *Pocillopora damicornis*. *Molecular Ecology* 26(15):3913–3925.



- 565 57. Lehnert EM, et al. (2014) Extensive Differences in Gene Expression Between Symbiotic and  
566 Aposymbiotic Cnidarians. *G3: Genes, Genomes, Genetics* 4(2):277–295.
- 567 58. Makeyev AV, Liebhaber SA (2002) The poly(C)-binding proteins: a multiplicity of functions  
568 and a search for mechanisms. *RNA* 8(3):265–278.
- 569 59. You F, et al. (2009) PCBP2 mediates degradation of the adaptor MAVS via the HECT  
570 ubiquitin ligase AIP4. *Nature Immunology* 10(12):1300–1308.
- 571 60. Brubaker SW, Bonham KS, Zanoni I, Kagan JC (2015) Innate Immune Pattern Recognition: A  
572 Cell Biological Perspective. *Annu Rev Immunol* 33:257–290.
- 573 61. Chiu Y-H, Macmillan JB, Chen ZJ (2009) RNA polymerase III detects cytosolic DNA and  
574 induces type I interferons through the RIG-I pathway. *Cell* 138(3):576–591.
- 575 62. Hughes TP, et al. (2003) Climate Change, Human Impacts, and the Resilience of Coral  
576 Reefs. *Science* 301(5635):929–933.
- 577 63. Hoegh-Guldberg O, et al. (2007) Coral Reefs Under Rapid Climate Change and Ocean  
578 Acidification. *Science* 318(5857):1737–1742.
- 579 64. Edmunds PJ, Gates RD (2003) Has Coral Bleaching Delayed Our Understanding of  
580 Fundamental Aspects of Coral–Dinoflagellate Symbioses? *BioScience* 53(10):976–980.
- 581 65. Prud’homme B, Gompel N, Carroll SB (2007) Emerging principles of regulatory evolution.  
582 *PNAS* 104(suppl 1):8605–8612.
- 583 66. Cleves PA, Strader ME, Bay LK, Pringle JR, Matz MV (2018) CRISPR/Cas9-mediated genome  
584 editing in a reef-building coral. *PNAS* 115(20):5235–5240.
- 585 67. Jones VAS, Bucher M, Hambleton EA, Guse A (2018) Microinjection to deliver protein,  
586 mRNA, and DNA into zygotes of the cnidarian endosymbiosis model *Aiptasia* sp. *Scientific*  
587 *Reports* 8(1):16437.
- 588 68. Ohdera AH, et al. (2018) Upside-Down but Headed in the Right Direction: Review of the  
589 Highly Versatile *Cassiopea xamachana* System. *Front Ecol Evol* 6.  
590 doi:10.3389/fevo.2018.00035.
- 591 69. Grabherr MG, et al. (2011) Trinity: reconstructing a full-length transcriptome without a  
592 genome from RNA-Seq data. *Nat Biotechnol* 29(7):644–652.
- 593 70. Kenkel CD, Bay LK (2017) Novel transcriptome resources for three scleractinian coral  
594 species from the Indo-Pacific. *GigaScience* 6(9):1–4.
- 595 71. Polato NR, Vera JC, Baums IB (2011) Gene discovery in the threatened elkhorn coral: 454  
596 sequencing of the *Acropora palmata* transcriptome. *PLoS ONE* 6(12):e28634.



- 597 72. Shinzato C, et al. (2011) Using the *Acropora digitifera* genome to understand coral  
598 responses to environmental change. *Nature* 476(7360):320–3.
- 599 73. Traylor-Knowles N, et al. (2011) Production of a reference transcriptome and  
600 transcriptomic database (PocilloporaBase) for the cauliflower coral, *Pocillopora*  
601 *damicornis*. *BMC Genomics* 12(1):585.
- 602 74. Lehnert EM, Burriesci MS, Pringle JR (2012) Developing the anemone *Aiptasia* as a  
603 tractable model for cnidarian-dinoflagellate symbiosis: the transcriptome of aposymbiotic  
604 *A. pallida*. *BMC genomics* 13:271.
- 605 75. Moya A, et al. (2012) Whole transcriptome analysis of the coral *Acropora millepora* reveals  
606 complex responses to CO<sub>2</sub>-driven acidification during the initiation of calcification.  
607 *Molecular ecology* 21(10):2440–54.
- 608 76. Kenkel CD, Meyer E, Matz M V (2013) Gene expression under chronic heat stress in  
609 populations of the mustard hill coral (*Porites astreoides*) from different thermal  
610 environments. *Molecular ecology* 22(16):4322–34.
- 611 77. Libro S, Kaluziak ST, Vollmer S V. (2013) RNA-seq profiles of immune related genes in the  
612 staghorn coral *Acropora cervicornis* Infected with white band disease. *PLoS ONE* 8(11):1–  
613 11.
- 614 78. Sun J, Chen Q, Lun JCY, Xu J, Qiu JW (2013) PearnBase: Development of a Transcriptomic  
615 Database for the Brain Coral *Platygyra carnosus*. *Marine Biotechnology* 15:244–251.
- 616 79. Maor-Landaw K, et al. (2014) Gene expression profiles during short-term heat stress in the  
617 red sea coral *Stylophora pistillata*. *Global Change Biology* 20:3026–3035.
- 618 80. Nordberg H, et al. (2014) The genome portal of the Department of Energy Joint Genome  
619 Institute: 2014 updates. *Nucleic Acids Research* 42(November 2013):26–31.
- 620 81. Shinzato C, Inoue M, Kusakabe M (2014) A snapshot of a coral “holobiont”: A  
621 transcriptome assembly of the scleractinian coral, *Porites*, captures a wide variety of genes  
622 from both the host and symbiotic zooxanthellae. *PLoS ONE* 9(1).  
623 doi:10.1371/journal.pone.0085182.
- 624 82. Kitchen SA, Crowder CM, Poole AZ, Weis VM, Meyer E (2015) De novo assembly and  
625 characterization of four anthozoan (phylum Cnidaria) transcriptomes. *G3 Genes Genomes*  
626 *Genetics* 5(11):2441–2452.
- 627 83. Anderson DA, Walz ME, Weil E, Tonellato P, Smith MC (2016) RNA-Seq of the Caribbean  
628 reef-building coral *Orbicella faveolata* (Scleractinia-Merulinidae) under bleaching and  
629 disease stress expands models of coral innate immunity. *PeerJ* 4:e1616.

- 630 84. Davies SW, Marchetti A, Ries JB, Castillo KD (2016) Thermal and pCO<sub>2</sub> stress elicit  
631 divergent transcriptomic responses in a resilient coral. *Frontiers in Marine Science* 3:Article  
632 122.
- 633 85. Li W, Godzik A (2006) Cd-hit: A fast program for clustering and comparing large sets of  
634 protein or nucleotide sequences. *Bioinformatics* 22(13):1658–1659.
- 635 86. Haas BJ, et al. (2013) De novo transcript sequence reconstruction from RNA-seq using the  
636 Trinity platform for reference generation and analysis. *Nature Protocols* 8(8):1494–1512.
- 637 87. Wattam AR, et al. (2014) PATRIC, the bacterial bioinformatics database and analysis  
638 resource. *Nucleic Acids Research* 42(Database issue):581–591.
- 639 88. Stamatakis A (2014) RAxML version 8: A tool for phylogenetic analysis and post-analysis of  
640 large phylogenies. *Bioinformatics* 30:1312–1313.
- 641 89. Huson DH, Scornavacca C (2012) Dendroscope 3: An interactive tool for rooted  
642 phylogenetic trees and networks. *Systematic Biology* 61(6):1061–1067.
- 643 90. Price MN, Dehal PS, Arkin AP (2009) Fasttree: Computing large minimum evolution trees  
644 with profiles instead of a distance matrix. *Molecular Biology and Evolution* 26(7):1641–  
645 1650.
- 646 91. Talevich E, Invergo BM, Cock PJ, Chapman B a (2012) Bio.Phylo: A unified toolkit for  
647 processing, analyzing and visualizing phylogenetic trees in Biopython. *BMC Bioinformatics*  
648 13:209.
- 649 92. Benjamini Y, Hochberg Y (1995) Controlling the False Discovery Rate: a Practical and  
650 Powerful Approach to Multiple Testing. *Journal of the Royal Statistical Society* 57(1):289–  
651 300.
- 652 93. Huntley RP, et al. (2015) The GOA database: Gene Ontology annotation updates for 2015.  
653 *Nucleic Acids Research* 43(D1):D1057–D1063.
- 654 94. Kerr AM, Baird AH, Hughes TP (2011) Correlated evolution of sex and reproductive mode  
655 in corals (Anthozoa: Scleractinia). *Proceedings of the Royal Society of London B: Biological*  
656 *Sciences* 278(1702):75–81.

657

658

659

660

661

662 FIGURES & FIGURE LEGENDS

663  
 664 Figure 1. Species tree with phenotypic labels indicating transmission mode, reproductive mode  
 665 and sexual system (4, 26, 94). Vertically transmitting species are indicated by filled circles at  
 666 their terminal nodes, horizontally transmitting species with open circles at their terminal nodes.  
 667 For each clade (1-8), the particular branch examined for convergent substitutions and positive  
 668 selection is indicated by a green highlight. In each case, this is the branch leading the common  
 669 ancestor of the clade. Shaded clades were considered when describing overlapping convergence  
 670 events, referred to as (1) Sister *Montipora*, (2) *Montipora*, (3) Sister *Galaxia*, (4) *Galaxia*, (5)  
 671 *Porites*, (6) Sister *Porites*, (7) Sister Pocilloporid, (8) Pocilloporid.  
 672

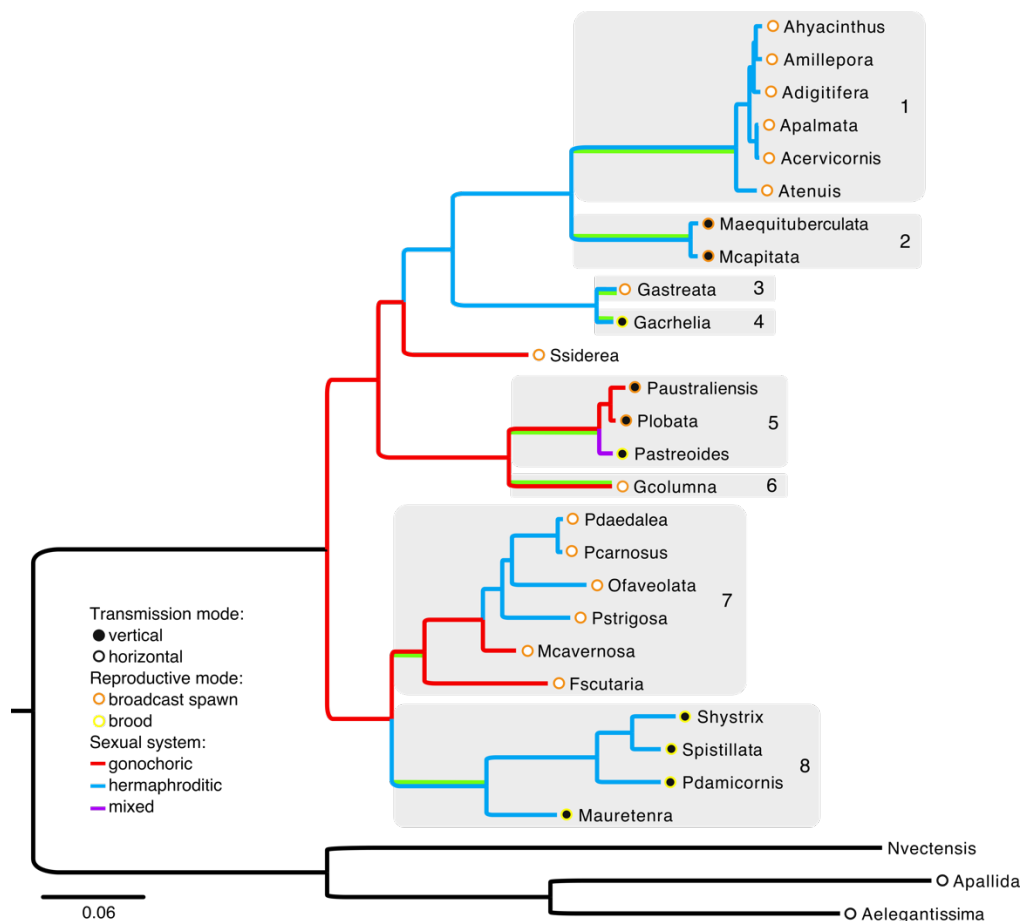

673  
 674  
 675  
 676  
 677  
 678  
 679  
 680  
 681  
 682

683 Figure 2. Frequency of convergence events. (A) An overlapping substitution is defined as an  
 684 inferred amino acid change that occurred at the same position independently in the lineages  
 685 leading to the common ancestor of the two indicated vertically transmitting clades. Each  
 686 overlapping substitution was classified into one of four categories: convergent substitutions  
 687 (least frequent; salmon) are changes from different amino acids to the same amino acid; parallel  
 688 substitutions (second most frequent; green) are changes from the same amino acid to the same  
 689 new amino acid; divergent substitutions (most common; teal) are changes from the same amino  
 690 acid to a different one; ‘all different’ substitutions (third most common; purple) are changes from  
 691 different amino acids to different new amino acids. (B) Histogram of the number of sites  
 692 showing molecular convergence (convergent or parallel substitutions) per tested gene (mean =  
 693 0.71; median=0).  
 694

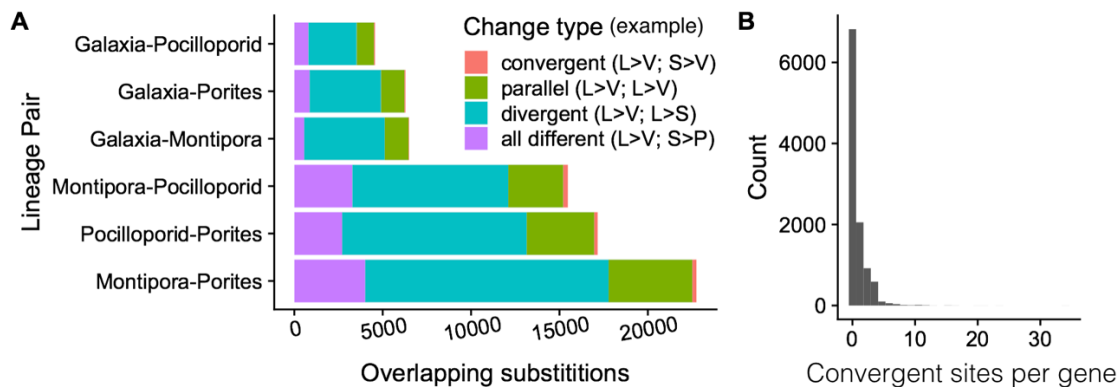

695  
696

697 Figure 3. Frequency of genes exhibiting overlap in convergence and positive selection, and  
 698 results of a categorical functional enrichment analysis of these candidates. (A) Frequency of  
 699 genes exhibiting both signatures of convergence and positive selection per pair of vertically  
 700 transmitting clades. Black shading indicates the set of genes with at least one convergence event  
 701 and evidence of positive selection (FDR < 0.1) in at least one of the indicated lineages. (B) Gene  
 702 ontology enrichment across all convergent and positively selected genes identified for any pair of  
 703 vertically transmitting clades relative to the global gene list. Significance level is indicated by  
 704 bolded text. (BP) Biological Processes, (CC) Cellular Component, (MF) Molecular Function.  
 705

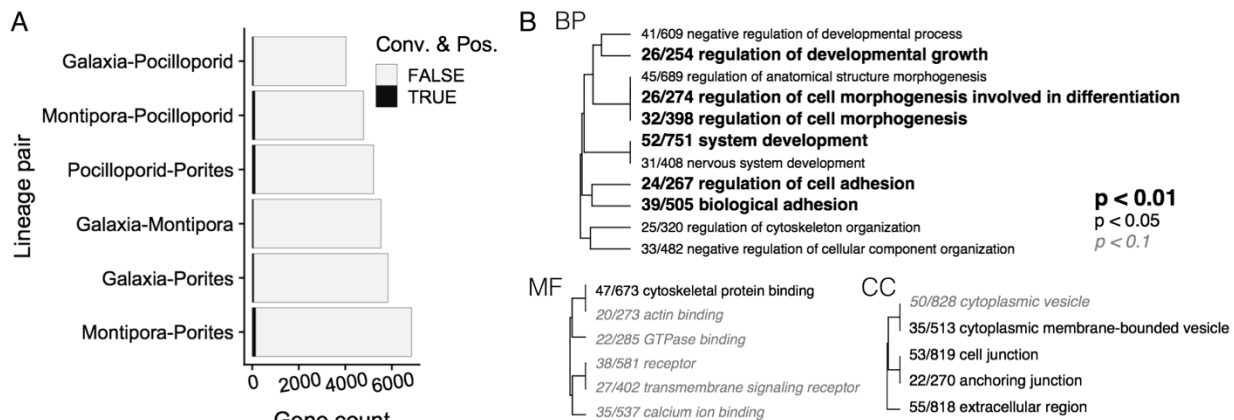

706  
707

708 Figure 4. Select genes showing molecular convergence and positive selection at the same site.  
 709 Left panels show gene trees constructed from nucleotides for each gene. Molecular convergence  
 710 events that also showed evidence of positive selection are indicated with vertical bars. Tables  
 711 show details of the molecular convergence events and evidence of positive selection: (Pos)  
 712 amino acid position of convergence event; (Vert.1) first vertical lineage; (Vert. 2) second vertical  
 713 lineage; (Anc.1) Ancestral amino acid for first vertical lineage; (Anc.2) Ancestral amino acid for  
 714 second vertical lineage; (Sub.1) derived amino acid for first vertical lineage; (Sub.2) derived  
 715 amino acid for second vertical lineage; (BEB all) Bayes Empirical Bayes posterior probability  
 716 for positive selection at the position for the branch site test including all vertical transmitting  
 717 lineages as foreground. Derived amino acids with BEB posteriors > 0.8 for tests using individual  
 718 lineages as foreground are indicated with asterisks.

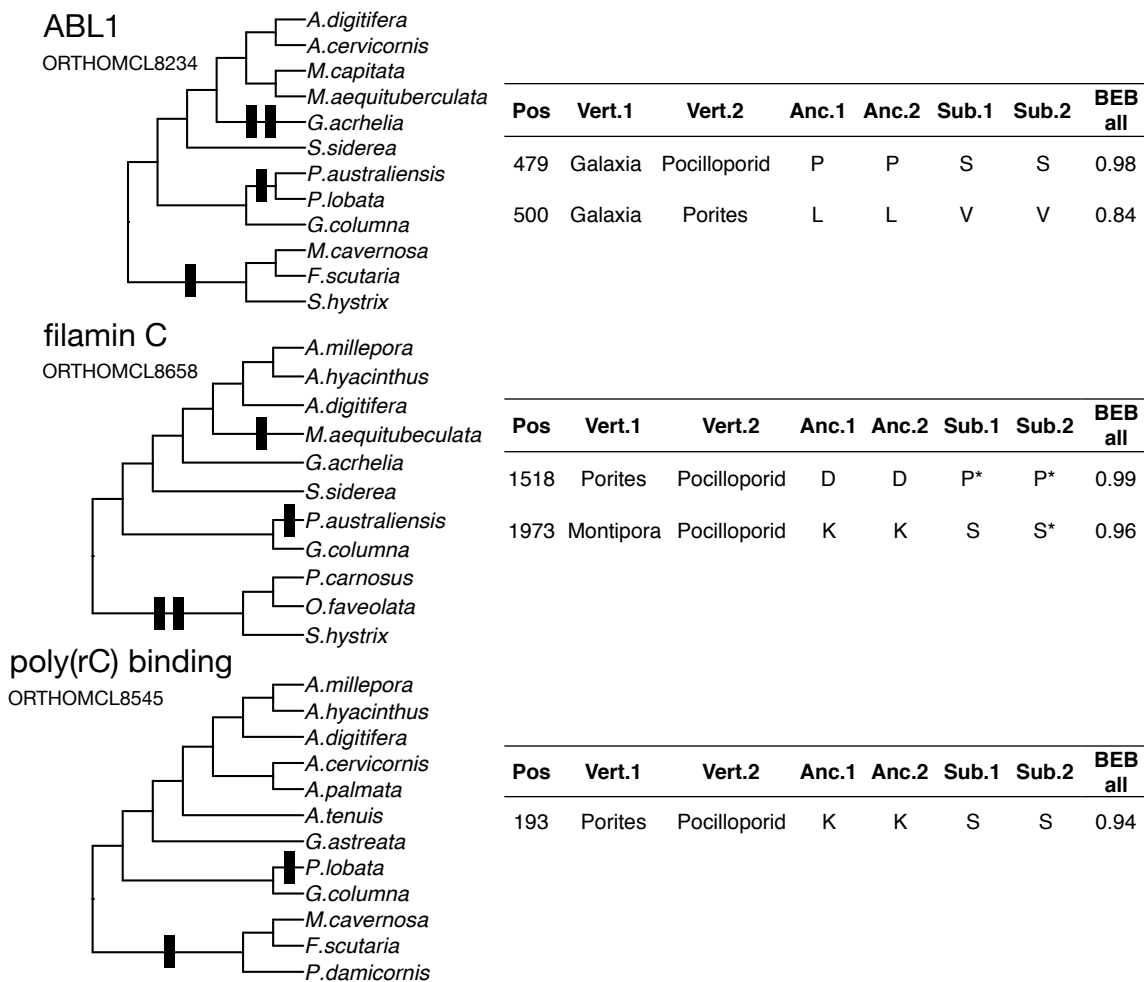

719

720

721

722

723

724 SUPPLEMENTARY MATERIAL

725 Table S1. Sources of reference transcriptomes used for each species.

| order        | family           | Genus                 | species                 | Citation                    | URL                                                                                                                                                                                                                         |
|--------------|------------------|-----------------------|-------------------------|-----------------------------|-----------------------------------------------------------------------------------------------------------------------------------------------------------------------------------------------------------------------------|
| Actiniaria   | Actiniidae       | <i>Anthopleura</i>    | <i>elegantissima</i>    | Kitchen et al. 2015         | <a href="http://people.oregonstate.edu/~meyere/data.html">http://people.oregonstate.edu/~meyere/data.html</a>                                                                                                               |
| Actiniaria   | Aiptasiidae      | <i>Aiptasia</i>       | <i>pallida</i>          | Lehnert et al. 2012         | <a href="http://pringlelab.stanford.edu/project%20files/AposymbioticAiptasiaTranscriptomeGoodLocif.ga.gz">http://pringlelab.stanford.edu/project%20files/AposymbioticAiptasiaTranscriptomeGoodLocif.ga.gz</a>               |
| Actiniaria   | Edwardsiidae     | <i>Nematostella</i>   | <i>vectensis</i>        | Nordberg et al. 2014        | <a href="http://genome.jgi-psf.org/Nemve1/Nemve1.download.ftp.html">http://genome.jgi-psf.org/Nemve1/Nemve1.download.ftp.html</a>                                                                                           |
| Scleractinia | Acroporidae      | <i>Acropora</i>       | <i>cervicornis</i>      | Libro et al. 2013           | <a href="http://www.ncbi.nlm.nih.gov/nuccore?LinkName=bioproject_nuccore&amp;from_uid=222758">http://www.ncbi.nlm.nih.gov/nuccore?LinkName=bioproject_nuccore&amp;from_uid=222758</a>                                       |
| Scleractinia | Acroporidae      | <i>Acropora</i>       | <i>palmata</i>          | Polato et al. 2011          | <a href="http://www.personal.psu.edu/ibb3/Research.htm#Data">http://www.personal.psu.edu/ibb3/Research.htm#Data</a>                                                                                                         |
| Scleractinia | Acroporidae      | <i>Acropora</i>       | <i>hyacinthus</i>       | Barshis et al. 2013         | <a href="http://palumbi.stanford.edu/data/">http://palumbi.stanford.edu/data/</a>                                                                                                                                           |
| Scleractinia | Acroporidae      | <i>Acropora</i>       | <i>tenuis</i>           | none                        | <a href="http://www.bio.utexas.edu/research/matz_lab/matzlab/Data_files/aten_july2014.zip">http://www.bio.utexas.edu/research/matz_lab/matzlab/Data_files/aten_july2014.zip</a>                                             |
| Scleractinia | Acroporidae      | <i>Acropora</i>       | <i>millepora</i>        | Moya et al. 2012            | <a href="http://www.bio.utexas.edu/research/matz_lab/matzlab/Data_files/amil_july2014.zip">http://www.bio.utexas.edu/research/matz_lab/matzlab/Data_files/amil_july2014.zip</a>                                             |
| Scleractinia | Acroporidae      | <i>Acropora</i>       | <i>digitifera</i>       | Shinzato et al. 2011        | <a href="http://marinegenomics.oist.jp/genomes/downloads?project_id=3">http://marinegenomics.oist.jp/genomes/downloads?project_id=3</a>                                                                                     |
| Scleractinia | Astocoeniidae    | <i>Madracis</i>       | <i>auretenra</i>        | none                        | <a href="http://people.oregonstate.edu/~meyere/data.html">http://people.oregonstate.edu/~meyere/data.html</a>                                                                                                               |
| Scleractinia | Favidae          | <i>Platygyra</i>      | <i>carnosus</i>         | Sun et al. 2013             | <a href="http://www.comp.hku.edu.hk/~db/PCarnBase/">http://www.comp.hku.edu.hk/~db/PCarnBase/</a>                                                                                                                           |
| Scleractinia | Favidae          | <i>Platygyra</i>      | <i>daedalea</i>         | none                        | <a href="http://people.oregonstate.edu/~meyere/data.html">http://people.oregonstate.edu/~meyere/data.html</a>                                                                                                               |
| Scleractinia | Fungiidae        | <i>Fungia</i>         | <i>scutaria</i>         | Kitchen et al. 2015         | <a href="http://people.oregonstate.edu/~meyere/data.html">http://people.oregonstate.edu/~meyere/data.html</a>                                                                                                               |
| Scleractinia | Merulinidae      | <i>Orbicella</i>      | <i>faveolata</i>        | Anderson et al. 2016        | <a href="https://peerj.com/articles/1616/#supplemental-information">https://peerj.com/articles/1616/#supplemental-information</a>                                                                                           |
| Scleractinia | Montastraeidae   | <i>Montastraea</i>    | <i>cavernosa</i>        | Kitchen et al. 2015         | <a href="http://people.oregonstate.edu/~meyere/data.html">http://people.oregonstate.edu/~meyere/data.html</a>                                                                                                               |
| Scleractinia | Mussidae         | <i>Pseudodiploria</i> | <i>strigosa</i>         | none                        | <a href="http://people.oregonstate.edu/~meyere/data.html">http://people.oregonstate.edu/~meyere/data.html</a>                                                                                                               |
| Scleractinia | Pocilloporidae   | <i>Pocillopora</i>    | <i>damicornis</i>       | Traylor-Knowles et al. 2011 | <a href="http://cnidarians.bu.edu/PocilloporaBase/cgi-bin/pdamdata.cgi">http://cnidarians.bu.edu/PocilloporaBase/cgi-bin/pdamdata.cgi</a>                                                                                   |
| Scleractinia | Pocilloporidae   | <i>Seriopora</i>      | <i>hystrix</i>          | Kitchen et al. 2015         | <a href="http://people.oregonstate.edu/~meyere/data.html">http://people.oregonstate.edu/~meyere/data.html</a>                                                                                                               |
| Scleractinia | Pocilloporidae   | <i>Stylophora</i>     | <i>pistillata</i>       | Maor-Landaw et al. 2014     | <a href="http://data.centrescientifique.mc/Data/">http://data.centrescientifique.mc/Data/</a>                                                                                                                               |
| Scleractinia | Poritidae        | <i>Porites</i>        | <i>astreoides</i>       | Kenkel et al. 2013          | <a href="http://www.bio.utexas.edu/research/matz_lab/matzlab/Data_files/pastreoides_may2014.zip">http://www.bio.utexas.edu/research/matz_lab/matzlab/Data_files/pastreoides_may2014.zip</a>                                 |
| Scleractinia | Poritidae        | <i>Porites</i>        | <i>lobata</i>           | none                        | <a href="https://www.ncbi.nlm.nih.gov/bioproject/356802">https://www.ncbi.nlm.nih.gov/bioproject/356802</a>                                                                                                                 |
| Scleractinia | Poritidae        | <i>Porites</i>        | <i>australiensis</i>    | Shinzato et al. 2014        | <a href="https://www.ncbi.nlm.nih.gov/nuccore?term=236717%5B%5B%5D">https://www.ncbi.nlm.nih.gov/nuccore?term=236717%5B%5B%5D</a>                                                                                           |
| Scleractinia | Acroporidae      | <i>Montipora</i>      | <i>aequituberculata</i> | none                        | <a href="https://www.dropbox.com/s/qvq3kus89aflyxl/Maqa.tar.gz?dl=0">https://www.dropbox.com/s/qvq3kus89aflyxl/Maqa.tar.gz?dl=0</a>                                                                                         |
| Scleractinia | Acroporidae      | <i>Montipora</i>      | <i>capitata</i>         | Frazier et al. 2017         | <a href="ftp://ftp.ncbi.nlm.nih.gov/geo/series/GSE97888/suppl/GSE97888_Montiporacapitata_transcriptome.fasta.gz">ftp://ftp.ncbi.nlm.nih.gov/geo/series/GSE97888/suppl/GSE97888_Montiporacapitata_transcriptome.fasta.gz</a> |
| Scleractinia | Oculinidae       | <i>Galaxea</i>        | <i>acrhelia</i>         | Kenkel and Bay 2017         | <a href="http://dornsife.usc.edu/labs/carlslab/data/">http://dornsife.usc.edu/labs/carlslab/data/</a>                                                                                                                       |
| Scleractinia | Oculinidae       | <i>Galaxea</i>        | <i>astreata</i>         | Kenkel and Bay 2017         | <a href="http://dornsife.usc.edu/labs/carlslab/data/">http://dornsife.usc.edu/labs/carlslab/data/</a>                                                                                                                       |
| Scleractinia | Poritidae        | <i>Goniopora</i>      | <i>columnna</i>         | Kenkel and Bay 2017         | <a href="http://dornsife.usc.edu/labs/carlslab/data/">http://dornsife.usc.edu/labs/carlslab/data/</a>                                                                                                                       |
| Scleractinia | Siderastreaeidae | <i>Siderastrea</i>    | <i>siderea</i>          | Davies et al. 2016          | <a href="https://sarahdavies.wordpress.com/data/">https://sarahdavies.wordpress.com/data/</a>                                                                                                                               |

726

727 Figure S1: Examples of gene trees constructed for orthologous groups before and after paralog  
 728 pruning. Paralog pruning was performed to remove duplicate sequences from orthologous groups  
 729 if they came from a single species and formed a monophyletic clade. The figure shows gene trees  
 730 for two different orthologous groups before and after pruning. Duplicated sequences from single  
 731 species are shown in red. In the left orthologous group (ORTHMCL7233) a single duplicated  
 732 sequence from *Galaxia acrhelia* was removed. The longer of the two sequences  
 733 (*Gacrhelia\_16231.p1*) was retained. In the right orthologous group, duplicate sequences formed  
 734 monophyletic clades six species. In each of these cases, only the longest sequence was retained.  
 735

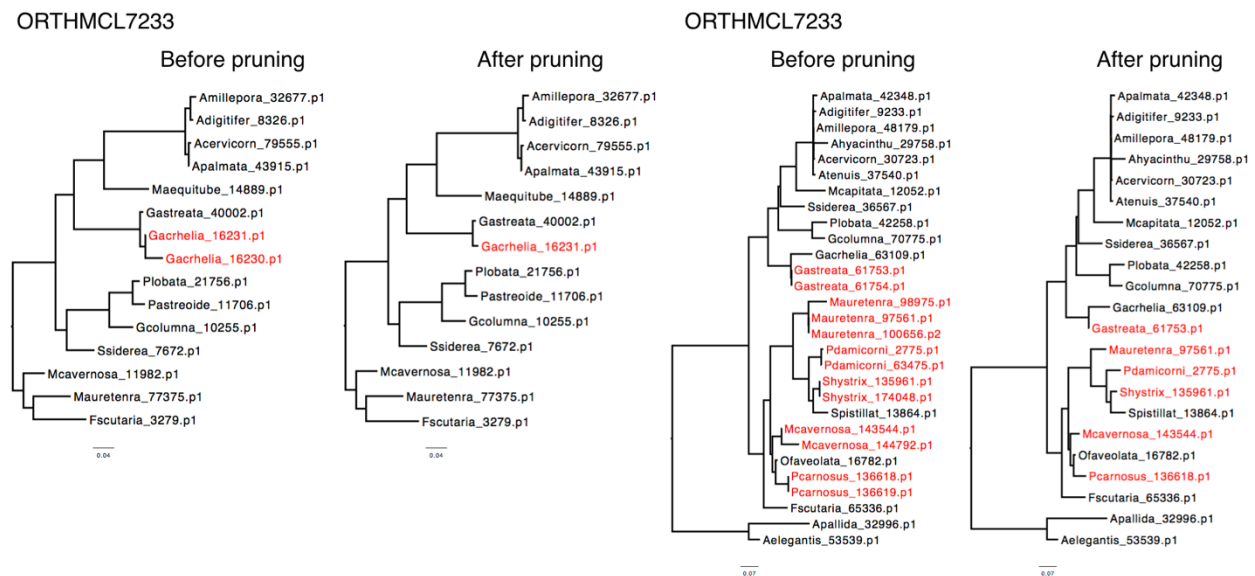

736



737 Figure S2: Categorization of all overlapping amino acid substitutions observed between all tested  
 738 lineage pairs. An overlapping substitution is defined as an inferred amino acid change that  
 739 occurred at the same position independently in the lineages leading to the common ancestor of  
 740 the two indicated clades. To simplify comparisons, horizontal clades are labeled based on  
 741 sisterhood to clades with vertical transmission (Fig. 1). Each overlapping substitution was  
 742 classified into one of four categories: convergent substitutions (least frequent; salmon) are  
 743 changes from different amino acids to the same amino acid; parallel substitutions (second most  
 744 frequent; green) are changes from the same amino acid to the same new amino acid; divergent  
 745 substitutions (most common; teal) are changes from the same amino acid to a different one; ‘all  
 746 different’ substitutions (third most common; purple) are changes from different amino acids to  
 747 different new amino acids. Examples of each type of overlapping substitution are show in in the  
 748 legend.

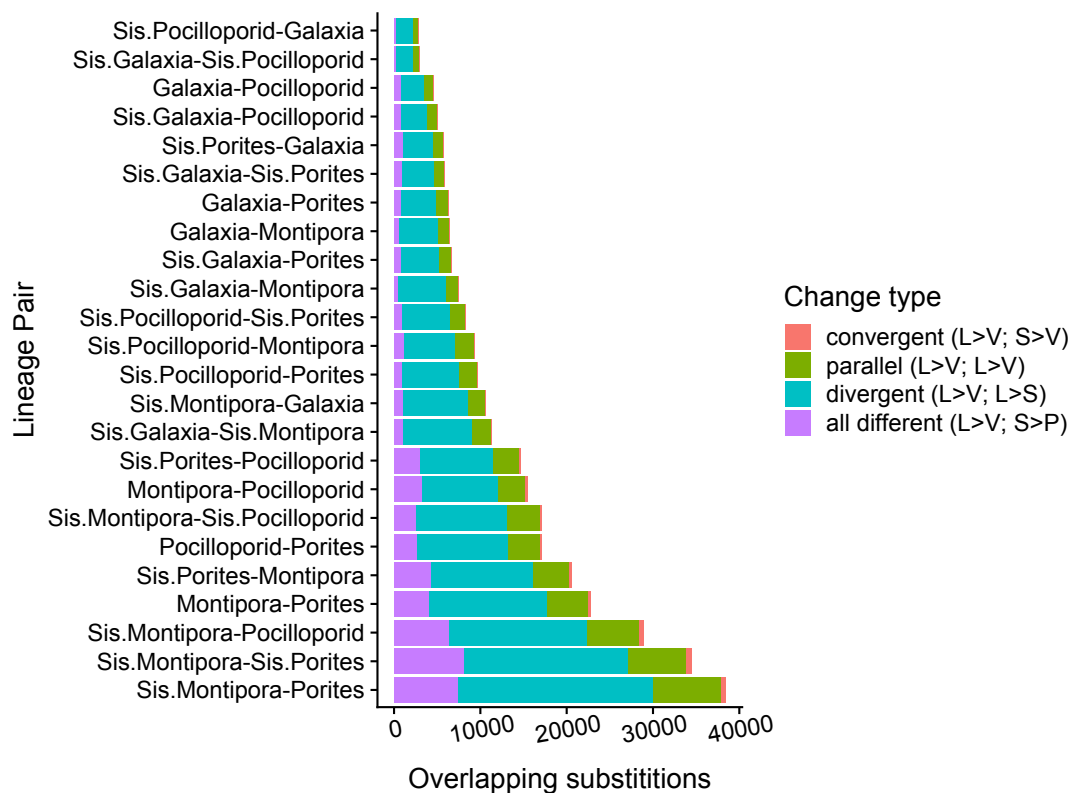

749  
 750  
 751  
 752  
 753  
 754  
 755  
 756  
 757  
 758  
 759  
 760

761 Figure S3: Comparison of frequency of convergent events among genes showing evidence of  
 762 positive selection. (A) Counts of convergence events in genes showing evidence of positive  
 763 selection in one or more of the indicated lineages. (B) Percentage of overlapping substitutions  
 764 that were convergence events in genes also showing evidence of positive selection one or more  
 765 of the indicated lineages. (C) Boxplot of the percentages in (B) split by phenotype pair, VV:  
 766 vertical-vertical pairs, VH: vertical-horizontal pairs, HH: horizontal-horizontal pairs.  
 767

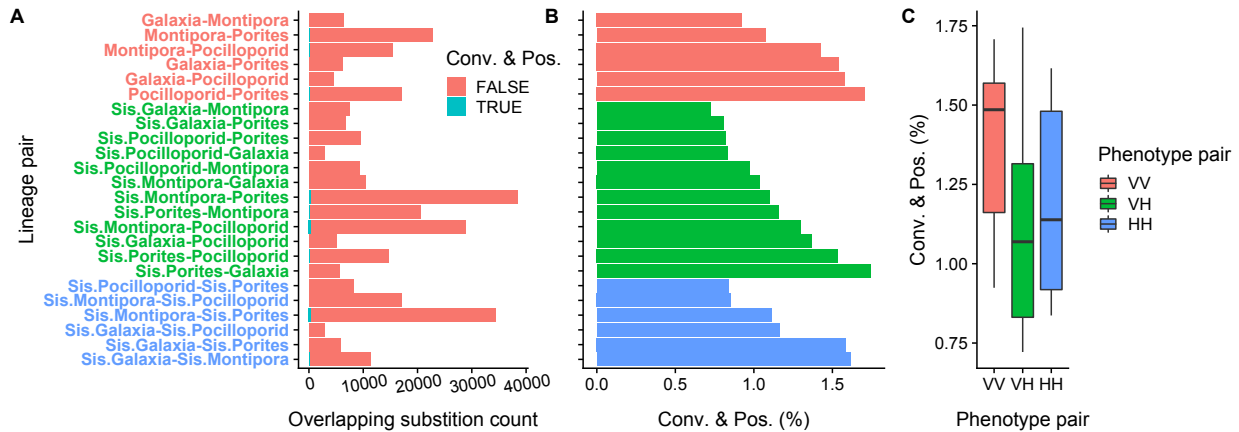

768  
 769  
 770 Figure S4: Comparison of the frequency of convergence events among overlapping substitutions.  
 771 (A) Absolute counts of overlapping substitutions and convergence events for each species pair.  
 772 (B) Percentage of overlapping substitutions that were convergence events. (C) Boxplot of the  
 773 percentages in (B) split by phenotype pair, VV: vertical-vertical pairs, VH: vertical-horizontal  
 774 pairs, HH: horizontal-horizontal pairs.  
 775

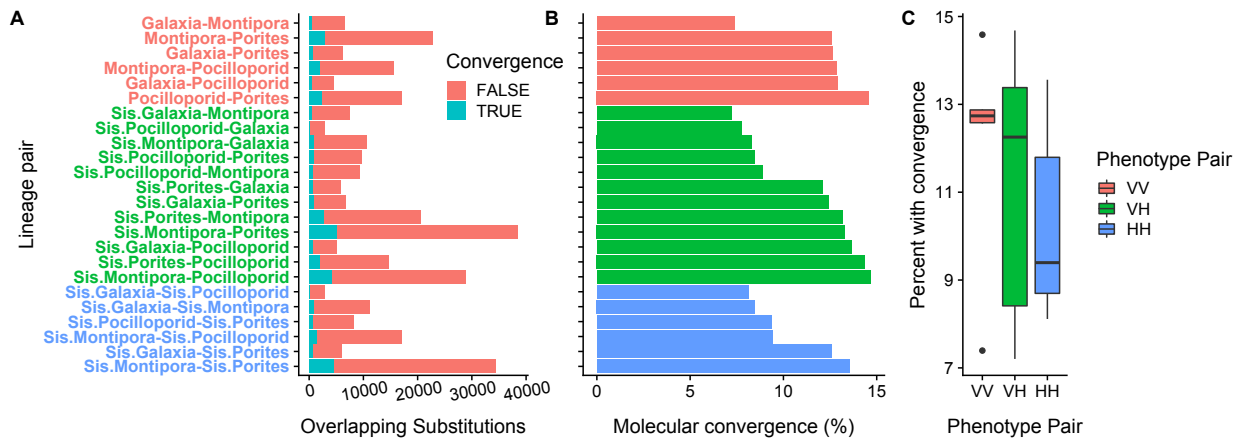

776  
 777  
 778  
 779  
 780  
 781  
 782  
 783



784 Figure S5: Comparison of the frequency of specific convergence events that were also identified  
 785 as being positively selected. (A) Counts of convergence events which were also the sites  
 786 exhibiting positive selection in one or more of the indicated lineages (Branch site test FDR < 0.1  
 787 for gene). (B) Percentage of overlapping substitutions that were convergence events in which the  
 788 specific change was also the site of positive selection in one or more of the indicated lineages.  
 789 Note that eight pairs have values of zero. (C) Boxplot of the percentages in (B) split by  
 790 phenotype pair, VV: vertical-vertical pairs, VH: vertical-horizontal pairs, HH: horizontal-  
 791 horizontal pairs.  
 792

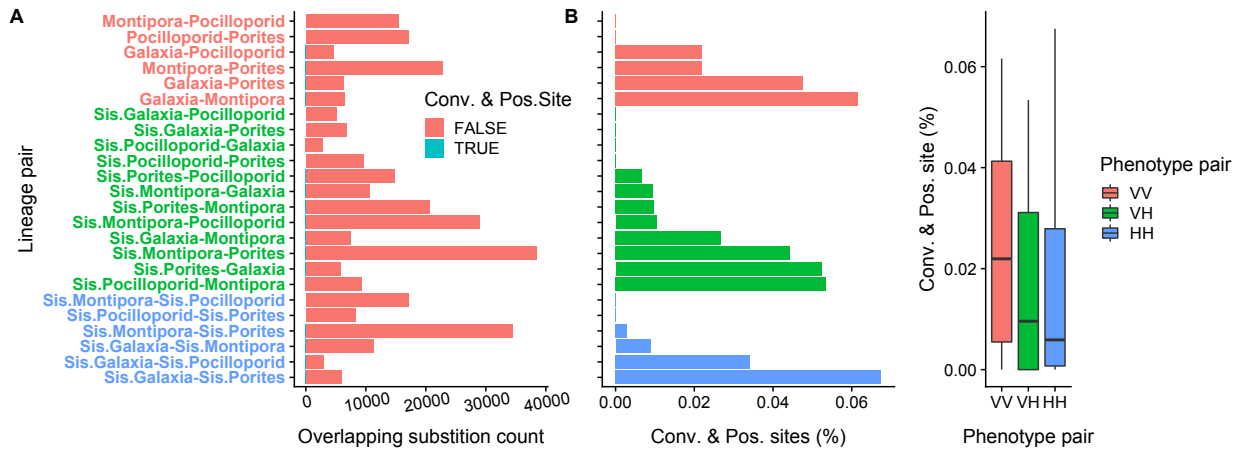

793  
794

795 Figure S6: Functional enrichment for genes with convergence events and evidence of positive  
 796 selection among horizontally transmitting sister clades. (A) Frequency of tested genes showing  
 797 convergence and positive selection per pair of horizontally transmitting clades. Teal shading  
 798 indicates the set of genes with at least one convergence event and evidence of positive selection  
 799 (FDR < 0.1) in at least one of the indicated lineages. (B) Gene ontology enrichment across all  
 800 convergent and positively selected genes identified for any pair of horizontally transmitting  
 801 clades relative to the global gene list. Significance level is indicated by bolded text. Fractions  
 802 preceding ontology terms indicate ... (BP) Biological Processes, (CC) Cellular Component,  
 803 (MF) Molecular Function. No ontology terms for Biological Process were significant.  
 804

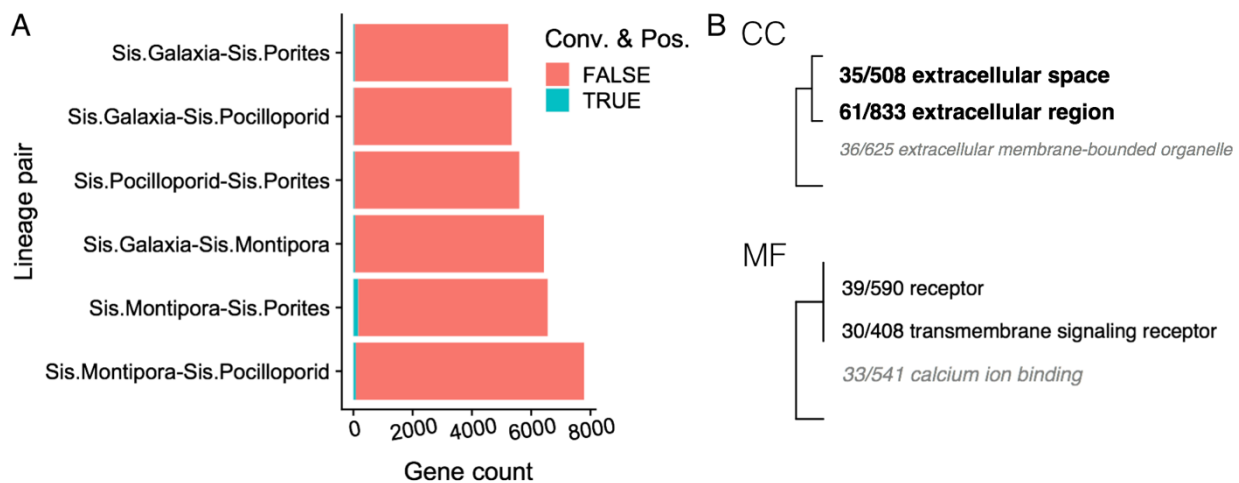

805  
806

807 Figure S7: Labeling of branches for branch site tests. When performing the branch site test, the  
808 branch or branches being tested for evidence of positive selection are labeled with “#1”. When  
809 testing for evidence of positive selection in a clade, we labeled only the branch leading to the  
810 common ancestor of that clade. In cases when a clade had only a single species, for example  
811 *Galaxia acrhelia*, the branch for that species was labeled.

812  
813

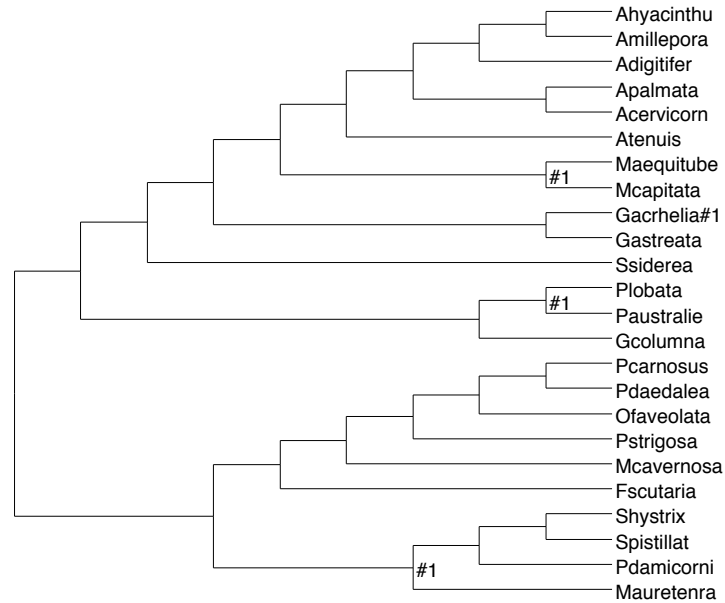

814  
815  
816
